# Supplementary material
Source: MDPI journal article supplement (https://www.mdpi.com/2227-7099/7/1/22)
Supplement: s1 [file s1]

## Sheet: Sheet1
zip	registeredvoters	ballotscast	yes	no	pctyes	pctyes100	measdyes	pcttrump	pctwhite	pctmale	medhomevalue	percapinc	foreign	population	logpop	measdiff	measdiff100	measdyes100	turnout	medhomevalue1000	turnout100	pcttrump100	commute	proximity
92101	23974	18185	8810	8490	0.509249	50.9249	0.416414	0.245719	76.4	59.2	457300	48423	20.4	34628	10.4524	0.092835	9.2835	41.6414	0.75853	457.3	75.853	24.5719	22.3	1
92113	19034	12112	5805	5647	0.506898	50.6898	0.517238	0.094129	32.3	56.2	253200	13106	34.6	41246	10.6273	-0.01034	-1.034	51.7238	0.636335	253.2	63.6335	9.4129	24.5	1
92106	12841	11244	4430	6389	0.409465	40.9465	0.33659	0.384105	83.2	52.2	826800	50829	10.5	15041	9.61854	0.072875	7.2875	33.659	0.875633	826.8	87.5633	38.4105	21.8	1
92173	14051	9944	5249	4141	0.558999	55.8999	0.510782	0.11596	86	45.3	279200	12115	45	22594	10.0254	0.048217	4.8217	51.0782	0.707708	279.2	70.7708	11.596	28.1	0
92115	27223	20756	7656	11546	0.398708	39.8708	0.442079	0.220888	61.6	50.2	384700	21778	23.9	49935	10.8185	-0.043371	-4.3371	44.2079	0.762444	384.7	76.2443	22.0888	24.1	0
92037	29922	25975	9032	14843	0.378304	37.8304	0.37747	0.280034	83.9	46.8	1100000	70030	22.1	31259	10.3501	0.000834	0.0834018	37.747	0.86809	1100	86.809	28.0034	22.1	0
92103	21817	19001	6123	12045	0.337021	33.7021	0.426386	0.160366	83.3	52.5	590400	51660	15	30329	10.3199	-0.089365	-8.9365	42.6386	0.870926	590.4	87.0926	16.0366	22.1	1
92107	17423	14586	5650	8256	0.406299	40.6299	0.394227	0.263882	90	49.6	701400	42266	6.1	24761	10.117	0.012072	1.2072	39.4227	0.837169	701.4	83.7169	26.3882	21	0
92110	15448	12663	5063	6937	0.421917	42.1917	0.388438	0.31487	80.9	50.9	496600	31954	14.1	24112	10.0905	0.033479	3.3479	38.8438	0.819718	496.6	81.9718	31.487	19.7	1
92121	1210	949	330	507	0.394265	39.4265	0.452351	0.187702	48.9	54.8	623900	43037	32.5	3782	8.23801	-0.058086	-5.8086	45.2351	0.784297	623.9	78.4298	18.7702	19.6	0
92126	36233	28754	12174	14992	0.448134	44.8134	0.422504	0.342018	37.8	52.4	409800	31324	39	64065	11.0677	0.02563	2.563	42.2504	0.793586	409.8	79.3586	34.2018	21.1	0
92109	26271	21391	9474	10828	0.466654	46.6654	0.392724	0.294705	91.4	53.2	690800	44074	13.5	42557	10.6586	0.07393	7.393	39.2724	0.814244	690.8	81.4244	29.4705	22.2	0
92104	24745	20556	6702	12918	0.34159	34.159	0.445867	0.126936	74.9	51.1	467600	32606	21.3	38099	10.5479	-0.104277	-10.4277	44.5867	0.830713	467.6	83.0713	12.6936	23.1	1
92025	0	0	0	0	0	0	0	0	81.2	50.6	415000	22343	31.2	37809	10.5403	0	0	0		415		0	25.3	0
92102	19607	14112	5488	7936	0.40882	40.882	0.465726	0.128957	70.2	50.8	294600	19543	32.6	33697	10.4252	-0.056906	-5.6906	46.5726	0.719743	294.6	71.9743	12.8957	25.2	1
92130	27646	23669	9746	12459	0.43891	43.891	0.372948	0.326848	64.1	49.8	870400	59757	32.5	35808	10.4859	0.065962	6.5962	37.2948	0.856146	870.4	85.6146	32.6848	20.5	0
92123	15140	12358	5119	6711	0.432713	43.2713	0.399396	0.339034	60.8	50.5	425600	32238	16.1	23942	10.0834	0.033317	3.3317	39.9396	0.816248	425.6	81.6248	33.9034	19.2	0
92116	24491	20755	6544	13348	0.328976	32.8976	0.43578	0.137075	76.5	51.9	493900	38071	15.7	28742	10.2661	-0.106804	-10.6804	43.578	0.847454	493.9	84.7454	13.7075	23.6	0
92122	22155	18480	5910	11256	0.344285	34.4285	0.406165	0.258928	59.8	47.6	603400	41682	34.5	40706	10.6141	-0.06188	-6.188	40.6165	0.834123	603.4	83.4123	25.8928	20.5	0
92120	19228	16497	6402	9446	0.403963	40.3963	0.362169	0.377582	81	49.8	483400	44123	13.5	22108	10.0037	0.041794	4.1794	36.2169	0.857968	483.4	85.7968	37.7582	22.1	0
92111	24616	19778	7947	10865	0.422443	42.2443	0.404914	0.328559	63	49.3	417900	28026	28.2	38911	10.569	0.017529	1.7529	40.4914	0.803461	417.9	80.3461	32.8559	22.6	0
92105	27448	18668	7805	9736	0.444958	44.4958	0.483668	0.168876	53.5	48.7	280600	15101	40.2	51132	10.8422	-0.03871	-3.871	48.3668	0.680122	280.6	68.0122	16.8876	25.2	0
92027	0	0	0	0	0	0	0	0	78.3	49.5	335000	21141	28.7	41422	10.6316	0	0	0		335		0	27	0
92145	1174	940	478	407	0.540113	54.0113	0.361045	0.467186	50.5	45.8	1100000	69180	40	1489	7.30586	0.179068	17.9068	36.1045	0.800681	1100	80.0681	46.7186	27.7	0
92128	23818	20649	8316	11271	0.424567	42.4567	0.342057	0.437687	67.5	46	528500	44456	23.8	38439	10.5568	0.08251	8.251	34.2057	0.866949	528.5	86.6949	43.7687	23.1	0
92117	31141	25925	10489	14324	0.422722	42.2722	0.375128	0.35375	75.2	51.1	477800	34113	20.6	44133	10.695	0.047594	4.7594	37.5128	0.832504	477.8	83.2504	35.375	20.7	0
92014	5236	4705	1690	2737	0.381748	38.1748	0.372558	0.28955	89.5	50.2	1200000	78996	17.8	11293	9.33194	0.00919	0.918999	37.2558	0.898587	1200	89.8587	28.955	24.5	0
92114	33207	23023	11421	10263	0.526702	52.6702	0.492375	0.2086	22.4	49.9	299300	18915	34.3	52670	10.8718	0.034327	3.4327	49.2375	0.693318	299.3	69.3318	20.86	27.4	0
92119	14709	12736	5258	6975	0.429821	42.9821	0.358301	0.404203	82.9	47.5	451900	34344	13.2	19414	9.87375	0.07152	7.152	35.8301	0.865865	451.9	86.5864	40.4203	23.3	0
92108	10844	8792	4000	4347	0.479214	47.9214	0.45239	0.27231	69.2	52.5	283300	40431	20.7	18252	9.81203	0.026824	2.6824	45.239	0.810771	283.3	81.0771	27.231	21.2	0
92154	37001	27517	14441	11741	0.551562	55.1562	0.486528	0.231064	68.4	52.3	293700	18562	34.9	65830	11.0948	0.065034	6.5034	48.6528	0.743683	293.7	74.3683	23.1064	27	0
92131	25855	22456	9892	11596	0.46035	46.035	0.345022	0.377381	68.7	48.1	644500	51082	21.9	24446	10.1042	0.115328	11.5328	34.5022	0.868536	644.5	86.8536	37.7381	24.1	0
92129	29986	25233	11006	12938	0.459656	45.9656	0.357032	0.381303	57.7	49.8	603600	41178	27.8	40472	10.6084	0.102624	10.2624	35.7032	0.841493	603.6	84.1493	38.1303	25.2	0
92127	14324	12206	5657	5856	0.491358	49.1358	0.361481	0.384715	58.1	47.2	659100	50812	27.2	29681	10.2983	0.129877	12.9877	36.1481	0.852136	659.1	85.2136	38.4715	27.3	0
92139	16810	12225	6164	5424	0.53193	53.193	0.479874	0.281234	45	47.6	291500	20371	31.6	27692	10.2289	0.052056	5.2056	47.9874	0.727246	291.5	72.7246	28.1234	28.3	0
92124	14509	12242	4979	6766	0.423925	42.3925	0.362554	0.361848	71.3	48.3	522300	36144	13.6	21351	9.96885	0.061371	6.1371	36.2554	0.843752	522.3	84.3752	36.1848	22.3	0
